# Supplementary material
Source: PubMed Central journal article supplement (PMC5496446)
Supplement: NIHMS864303-supplement-Supplement_Data_Discussion.pdf [file NIHMS864303-supplement-Supplement_Data_Discussion.pdf]

## Supplemental data to “Development and Characterization of Electronic-Cigarette Exposure Generation System (Ecig-EGS) for the physico-chemical and toxicological assessment of electronic cigarette emissions”

Jiayuan Zhao<sup>1</sup>,Georgios Pyrgiotakis<sup>1</sup> and Philip Demokritou<sup>1\*</sup>

<sup>1</sup>Department of Environmental Health, Center for Nanotechnology and Nanotoxicology, Harvard School of Public Health, Boston, MA, USA.

\*Corresponding author: Professor Philip Demokritou, Department of Environmental Health, Harvard School of Public Health, Boston, MA, 02115, USA. Tel: +1 6174323481. Email: pdemokri@hsph.harvard.edu.

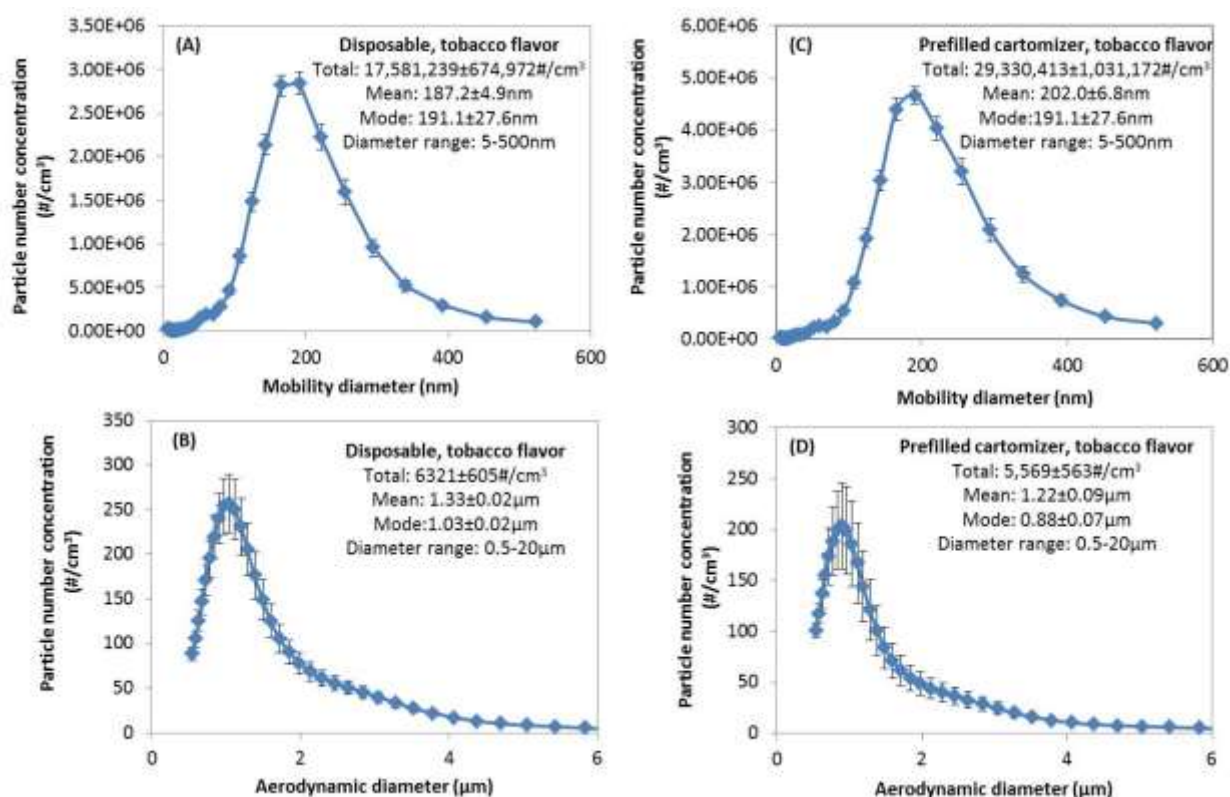

Figure S1. Particle number concentration generated by other types of e-cig: disposable: (A) mobility diameter range of 5-500 nm; (B) aerodynamic diameter range of 0.5-20 µm; and prefilled Vape Pen: (C) mobility diameter range of 5-500 nm; (D) aerodynamic diameter range of 0.5-20 µm. (Other parameters: puffing protocol: MPP protocol; applied voltage: 3.7V; environmental condition: 24°C and 35%RH; chamber residence time: 60s).

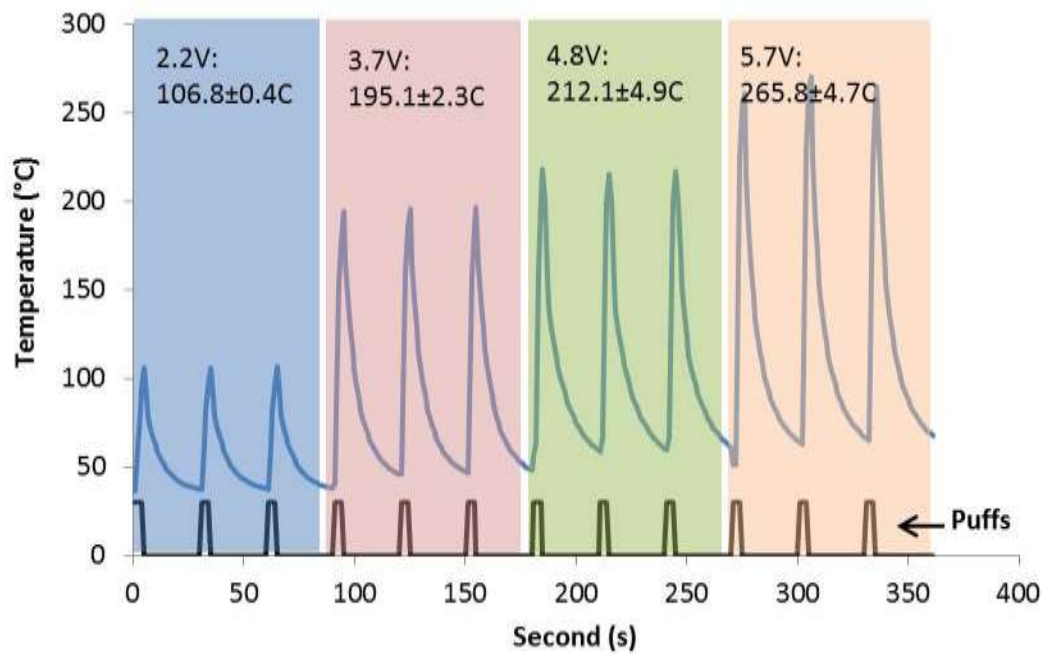

Figure S2. Correlation between operating temperature and applied voltage. The temperature was measured at the e-cig heating coil, in touch with e-liquid.

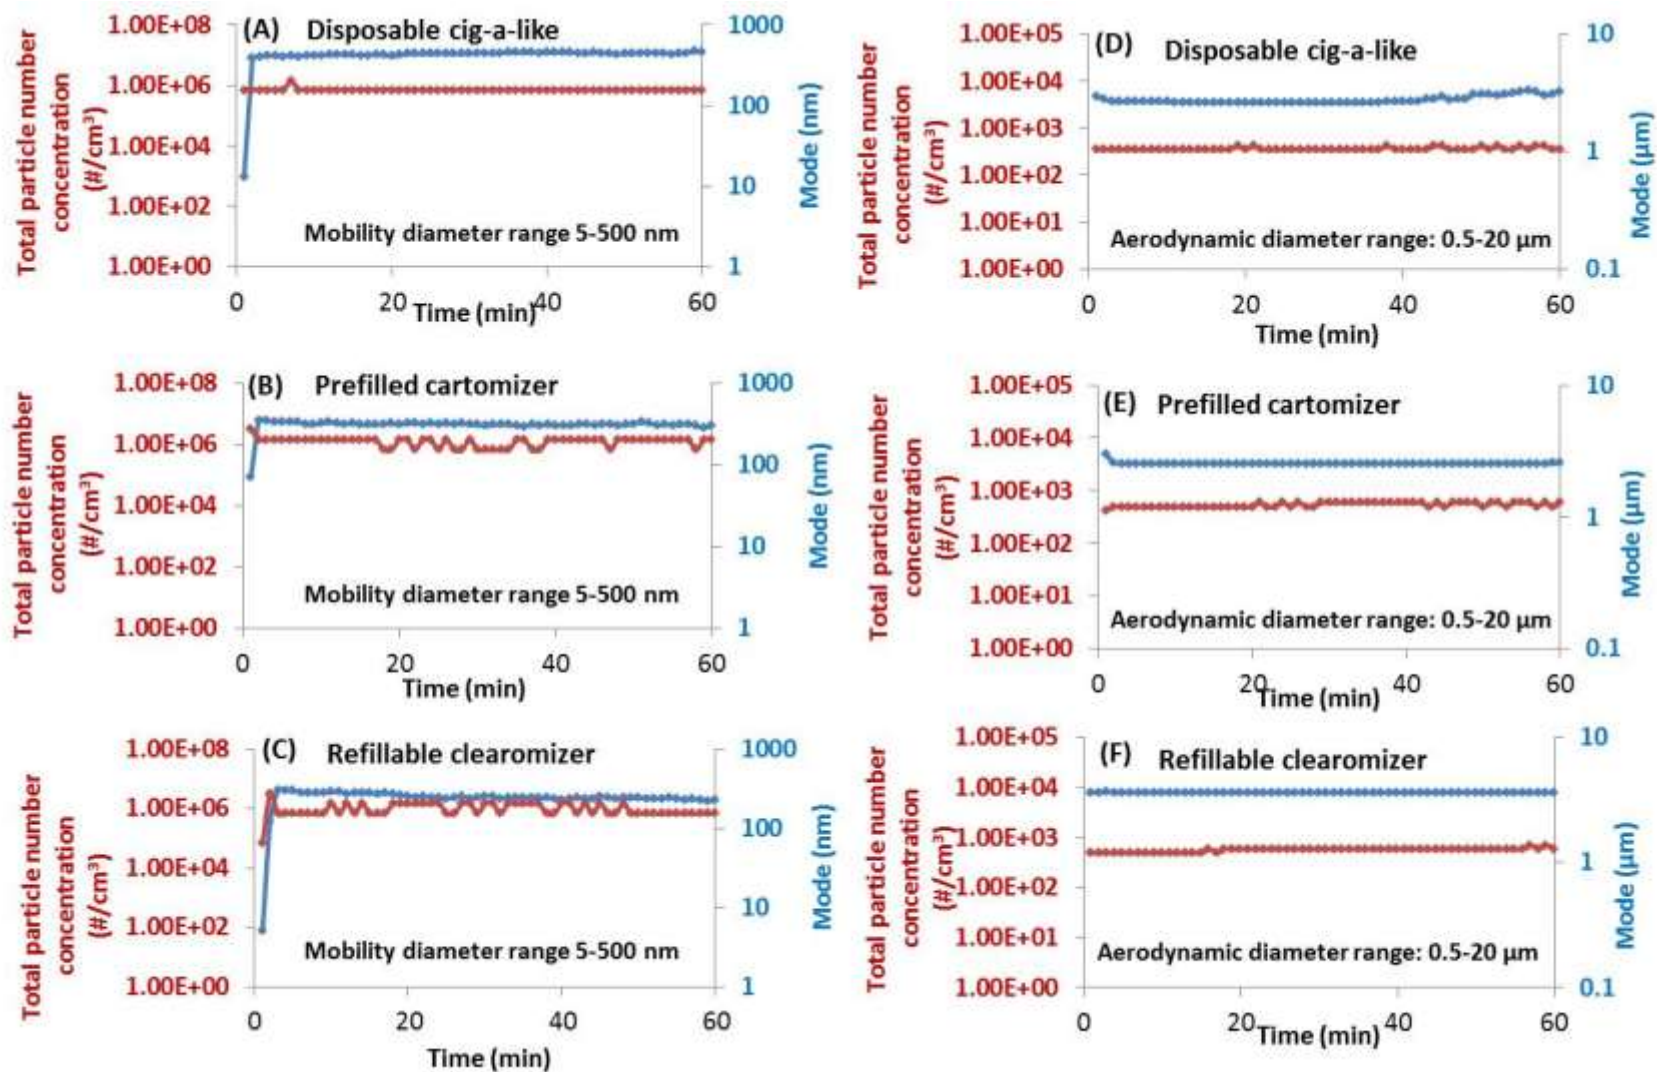

Figure S3. Steady state particle number concentration and mode over one hour. (A) disposable cig-a-like in mobility diameter range 5-500nm; (B) prefilled cartomizer in mobility diameter range 5-500nm; (C) refillable clearomizer in mobility diameter range 5-500nm; (D) disposable cig-a-like in aerodynamic diameter range 0.5-20μm; (E) prefilled cartomizer in aerodynamic diameter range 0.5-20μm; (F) refillable clearomizer aerodynamic diameter range 0.5-20μm. (Other parameters: puffing protocol: MPP protocol; applied voltage: 3.7V; environmental condition: 24°C and 35%RH; chamber residence time: 60s). The prefilled cartomizer used here was a different model compared to the one used in Figure S1. In this figure, mobility diameter was measured by NanoScan scanning mobility particle sizer (SMPS, Model 3910, TSI Inc., Shoreview, MN).
